# Supplementary material for: Glucagon-Like Peptide-1 Receptor Agonist Liraglutide Ameliorates the Development of Periodontitis
Source: PubMed Central journal article supplement (PMC7695495; doi:10.1155/2020/8843310), 2020-11-19
Supplement: 8843310.f1.pdf [file 8843310.f1.pdf]

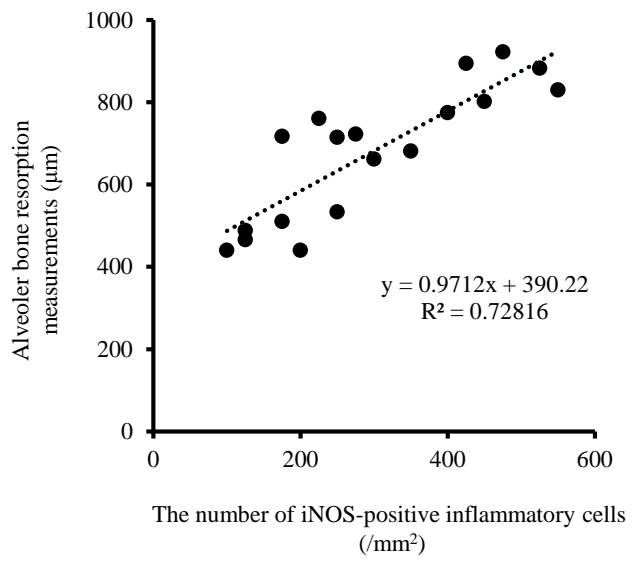

SUPPLEMENTAL FIGURE 1.
